# Supplementary material for: The Changing “Weightscape” of Bulimia Nervosa
Source: Atypon-hosted journal article supplement (doi:10.1176/appi.ajp.2012.12010147), 2012-10-01
Supplement: 1031_ds001.pdf [file 1031_ds001.pdf]

**TABLE S1. Presentation BMIs in Bulimia Nervosa Clinical Trials<sup>a</sup>**

| Study                            | Treatment <sup>b</sup>                                        | Baseline Mean BMI (SD)                                             |
|----------------------------------|---------------------------------------------------------------|--------------------------------------------------------------------|
| Agras et al., 2000 (1)           | CBT and IPT                                                   | 23.0 (4.7)                                                         |
| Bailer et al., 2004 (2)          | Self-help group<br>CBT group                                  | 21.7 (3.1)<br>20.7 (2.4)                                           |
| Beumont et al., 1997 (3)         | Nutritional counseling and fluoxetine                         | 22 (2)                                                             |
| Bulik et al., 1998 (4)           | CBT and exposure                                              | 22.4 (2.5)                                                         |
| Carruba et al., 2001 (5)         | Moclobemide<br>Placebo                                        | 20.35 (0.43)<br>20.49 (0.41)                                       |
| Carter et al., 2003 (6)          | Self-help                                                     | 23 (5)                                                             |
| Chen et al., 2003 (7)            | Group vs. individual CBT                                      | 22.19 (2.81)                                                       |
| Esplen et al., 1998 (8)          | Guided imagery<br>Control                                     | 21.0 (1.0)<br>21.3 (1.3)                                           |
| Fairburn et al., 1991 (9)        | CBT, IPT, BT                                                  | 22.2                                                               |
| Faris et al., 2000 (10)          | Ondansetron                                                   | 21.6 (2.5)                                                         |
| Fichter et al., 1996 (11)        | Fluvoxamine<br>Placebo                                        | 20.7 (4.0)<br>19.9 (3.3)                                           |
| Fluoxetine Group, 1992 (12)      | Placebo<br>Fluoxetine, 20 mg/day<br>Fluoxetine, 60 mg/day     | 22.6 (3.3)<br>22.7 (4.2)<br>22.4 (3.2)                             |
| Goldbloom et al., 1997 (13)      | Fluoxetine and CBT                                            | 23 (2.5)                                                           |
| Goldstein et al., 1999 (14)      | Fluoxetine 8 week trial<br>Fluoxetine 16 week trial           | 22<br>21                                                           |
| Kennedy et al., 1993 (15)        | Brofaromine<br>Placebo                                        | 26.2 (6.5)<br>24.2 (4.8)                                           |
| Laessle et al., 1991 (16)        | Stress management<br>Nutritional management                   | 20.6 (1.9)<br>21.2 (1.8)                                           |
| Mitchell et al., 2002 (17)       | IPT<br>Antidepressants                                        | 23.2 (3.7)<br>21.9 (2.5)                                           |
| Romano et al., 2002 (18)         | Fluoxetine<br>Placebo                                         | 22.5 (3.9)<br>23.0 (3.8)                                           |
| Safer et al., 2001 (19)          | DBT                                                           | 23.7 (5.6)                                                         |
| Sundgot-Borgen et al., 2002 (20) | Exercise<br>Cognitive<br>Nutrition<br>Waiting list<br>Control | 21.0 (2.0)<br>20.0 (1.9)<br>21.0 (2.1)<br>22.0 (2.5)<br>21.0 (1.9) |
| Thiels et al., 1998 (21)         | CBT<br>Guided self-change                                     | 21.1 (3.1)<br>22.6 (3.9)                                           |
| Treasure et al., 1999 (22)       | CBT<br>MET                                                    | 26.3 (9.3)<br>24.0 (6.5)                                           |

|                           |                                       |            |
|---------------------------|---------------------------------------|------------|
| Walsh et al., 2004 (23)   | Guided self-help plus fluoxetine      | 21.8 (3.4) |
|                           | Guided self-help plus placebo         | 22.8 (4.3) |
|                           | Pills only (fluoxetine)               | 24.3 (5.5) |
|                           | Pills only (placebo)                  | 24.0 (3.7) |
| Walsh et al., 1991 (24)   | Placebo                               | 22.0 (2.3) |
|                           | Desipramine                           | 22.4 (1.9) |
| Walsh et al., 1997 (25)   | CBT + medication                      | 21.6 (2.2) |
|                           | CBT + placebo                         | 22.1 (2.1) |
|                           | Supportive psychotherapy + medication | 21.7 (2.3) |
|                           | Supportive psychotherapy + placebo    | 21.7 (2.2) |
|                           | Medication only                       | 22.3 (2.1) |
|                           | Combined                              | 21.9 (2.2) |
| Wilfley et al., 1993 (26) | Group CBT and IPT                     | 32.8 (5.2) |

<sup>a</sup> Data presented, when available, for total sample, or by treatment group, or as presented in text. Data from Berkman ND, Bulik CM, Brownley KA, Lohr KN, Sedway JA, Rooks A, Gartlehner G: Management of Eating Disorders (Evidence Report/Technology Assessment No. 135; Prepared by the RTI International-University of North Carolina Evidence-Based Practice Center under contract no. 290-02-0016; AHRQ Publication No. 06-E010). Rockville, MD, Agency for Healthcare Research and Quality, April 2006.

<sup>b</sup> CBT=cognitive-behavioral therapy; MET=motivation enhancement therapy; DBT=dialectical behavioral therapy; BT=behavioral therapy; IPT=interpersonal psychotherapy.

## References

1. Agras WS, Walsh T, Fairburn CG, Wilson GT, Kraemer HC: A multicenter comparison of cognitive-behavioral therapy and interpersonal psychotherapy for bulimia nervosa. *Arch Gen Psychiatry* 2000; 57:459–466
2. Bailer U, de Zwaan M, Leisch F, Strnad A, Lennkh-Wolfsberg C, El-Giamal N, Hornik K, Kasper S: Guided self-help versus cognitive-behavioral group therapy in the treatment of bulimia nervosa. *Int J Eat Disord* 2004; 35:522–537
3. Beumont PJ, Russell JD, Touyz SW, Buckley C, Lowinger K, Talbot P, Johnson GF: Intensive nutritional counselling in bulimia nervosa: a role for supplementation with fluoxetine? *Aust NZ J Psychiatry* 1997; 31:514–524
4. Bulik C, Sullivan P, Carter F, McIntosh V, Joyce P: The role of exposure with response prevention in the cognitive-behavioral therapy for bulimia nervosa. *Psychol Med* 1998; 28:611–623
5. Carruba MO, Cuzzolaro M, Riva L, Bosello O, Liberti S, Castra R, Dalle Grave R, Santonastaso P, Garosi V, Nisoli E: Efficacy and tolerability of moclobemide in bulimia nervosa: a placebo-controlled trial. *Int Clin Psychopharmacol* 2001; 16:27–32
6. Carter J, Olmsted M, Kaplan A, McCabe R, Mills J, Aime A: Self-help for bulimia nervosa: a randomized controlled trial. *Am J Psychiatry* 2003; 160:973–978
7. Chen E, Touyz SW, Beumont PJ, Fairburn CG, Griffiths R, Butow P, Russell J, Schotte DE, Gertler R, Basten C: Comparison of group and individual cognitive-behavioral therapy for patients with bulimia nervosa. *Int J Eat Disord* 2003; 33:241–254

8. Esplen MJ, Garfinkel PE, Olmsted M, Gallop RM, Kennedy S: A randomized controlled trial of guided imagery in bulimia nervosa. *Psychol Med* 1998; 28:1347–1357
9. Fairburn CG, Jones R, Peveler RC, Carr SJ, Solomon RA, O'Connor ME, Burton J, Hope RA: Three psychological treatments for bulimia nervosa: a comparative trial. *Arch Gen Psychiatry* 1991; 48:463–469
10. Faris PL, Kim SW, Meller WH, Goodale RL, Oakman SA, Hofbauer RD, Marshall AM, Daughters RS, Banerjee-Stevens D, Eckert ED, Hartman BK: Effect of decreasing afferent vagal activity with ondansetron on symptoms of bulimia nervosa: a randomised, double-blind trial. *Lancet* 2000; 355:792–797
11. Fichter MM, Kruger R, Rief W, Holland R, Dohne J: Fluvoxamine in prevention of relapse in bulimia nervosa: effects on eating-specific psychopathology. *J Clin Psychopharmacol* 1996; 16:9–18
12. Fluoxetine Bulimia Nervosa Collaborative Study Group: Fluoxetine in the treatment of bulimia nervosa: a multicenter, placebo-controlled, double-blind trial. *Arch Gen Psychiatry* 1992; 49:139–147
13. Goldbloom DS, Olmsted M, Davis R, Clewes J, Heinmaa M, Rockert W, Shaw B: A randomized controlled trial of fluoxetine and cognitive behavioral therapy for bulimia nervosa: short-term outcome. *Behav Res Ther* 1997; 35:803–811
14. Goldstein DJ, Wilson MG, Ascroft RC, al-Banna M: Effectiveness of fluoxetine therapy in bulimia nervosa regardless of comorbid depression. *Int J Eat Disord* 1999; 25:19–27
15. Kennedy S, Goldbloom D, Ralevski E, Davis C, D'Souza J, Lofchy J: Is there a role for selective monoamine oxidase inhibitor therapy in bulimia nervosa? a placebo-controlled trial of brofaromine. *J Clin Psychopharmacol* 1993; 13:415–422
16. Laessle RG, Beumont PJ, Butow P, Lennerts W, O'Connor M, Pirke KM, Touyz SW, Waadt S: A comparison of nutritional management with stress management in the treatment of bulimia nervosa. *Br J Psychiatry* 1991; 159:250–261
17. Mitchell J, Halmi K, Wilson G, Agras W, Kraemer H, Crow S: A randomized secondary treatment study of women with bulimia nervosa who fail to respond to CBT. *Int J Eat Disord* 2002; 32:271–281
18. Romano SJ, Halmi KA, Sarkar NP, Koke SC, Lee JS: A placebo-controlled study of fluoxetine in continued treatment of bulimia nervosa after successful acute fluoxetine treatment. *Am J Psychiatry* 2002; 159:96–102
19. Safer DL, Telch CF, Agras WS: Dialectical behavior therapy for bulimia nervosa. *Am J Psychiatry* 2001; 158:632–634
20. Sundgot-Borgen J, Rosenvinge JH, Bahr R, Schneider LS: The effect of exercise, cognitive therapy, and nutritional counseling in treating bulimia nervosa. *Med Sci Sports Exerc* 2002; 34:190–195
21. Thiels C, Schmidt U, Treasure J, Garthe R, Troop N: Guided self-change for bulimia nervosa incorporating use of a self-care manual. *Am J Psychiatry* 1998; 155:947–953
22. Treasure JL, Katzman M, Schmidt U, Troop N, Todd G, de Silva P: Engagement and outcome in the treatment of bulimia nervosa: first phase of a sequential design comparing motivation enhancement therapy and cognitive behavioural therapy. *Behav Res Ther* 1999; 37:405–418

23. Walsh BT, Fairburn CG, Mickley D, Sysko R, Parides MK: Treatment of bulimia nervosa in a primary care setting. *Am J Psychiatry* 2004; 161:556–561
24. Walsh BT, Hadigan CM, Devlin MJ, Gladis M, Roose SP: Long-term outcome of antidepressant treatment for bulimia nervosa. *Am J Psychiatry* 1991; 148:1206–1212
25. Walsh BT, Wilson GT, Loeb KL, Devlin MJ, Pike KM, Roose SP, Fleiss J, Wateraux C: Medication and psychotherapy in the treatment of bulimia nervosa. *Am J Psychiatry* 1997; 154:523–531
26. Wilfley DE, Agras WS, Telch CF, Rossiter EM, Schneider JA, Cole AG, Sifford LA, Raeburn SD: Group cognitive-behavioral therapy and group interpersonal psychotherapy for the nonpurging bulimic individual: a controlled comparison. *J Consult Clin Psychol* 1993; 61:296–305
